# Supplementary material for: Does oral polio vaccine have non-specific effects on all-cause mortality? Natural experiments within a randomised controlled trial of early measles vaccine
Source: PubMed Central journal article supplement — BMJ Open. 2016 Dec 23;6(12):e013335. doi: 10.1136/bmjopen-2016-013335 (PMC5223718; doi:10.1136/bmjopen-2016-013335), 2016-12-23
Supplement: bmjopen-2016-013335supp_tables.pdf [file bmjopen-2016-013335supp_tables.pdf]

**Supplementary Table 1. Background factors for the OPV0 and No OPV0 groups (Table 1). Values are percentages (numbers) unless stated otherwise**

|                                                      | OPV0 (n=5563) | No OPV0 (n=854) | Test    |
|------------------------------------------------------|---------------|-----------------|---------|
| <b>Demographic factors</b>                           |               |                 |         |
| Median (interquartile range) age at enrolment (days) | 151 (142-157) | 152 (142-158)   | p=0.22  |
| Bandim district                                      | 42 (2363)     | 39 (329)        | P=0.03  |
| Male sex                                             | 50 (2773)     | 54 (462)        | p=0.02  |
| Twins                                                | 3 (190)       | 4 (32)          | p=0.62  |
| Mother died (no)                                     | 8             | 3               | p=0.17  |
| <b>Risk factors at enrolment</b>                     |               |                 |         |
| Not breast fed at 4.5 months                         | 3.5 (193)     | 3.3 (28)        | p=0.78  |
| Pigs in household                                    | 17 (937)      | 17 (145)        | p=0.92  |
| No of people/bed                                     | 2.9           | 2.9             | P=0.97  |
| No of people/sleeping room                           | 4.2           | 4.2             | P=0.40  |
| Toilet inside house                                  | 15 (855)      | 13 (115)        | p =0.15 |
| Functioning electricity                              | 26 (1442)     | 24 (206)        | p=0.26  |
| <b>Morbidity and anthropometry at enrolment</b>      |               |                 |         |
| Fever                                                | 10 (537)      | 5 (44)          | p=0.000 |
| Diarrhoea                                            | 5 (273)       | 2 (16)          | P=0.000 |
| Mean respiratory frequency                           | 43            | 42              | P=0.28  |
| BCG scar                                             | 86 (4788)     | 84 (717)        | P=0.10  |
| Have chloroquine at home                             | 34 (1864)     | 34 (289)        | P=0.85  |
| Mean (SD) weight (g)                                 | 7146 (999)    | 7101 (970)      | P=0.16  |
| Mean (SD) arm circumference (mm)                     | 142 (12)      | 140 (12)        | P<0.001 |
| Mean (SD) height (cm)                                | 64.1 (2.8)    | 63.7 (2.8)      | P<0.001 |
| Mean (SD) mother's arm circumference (mm)            | 275 (34)      | 269 (32)        | P<0.001 |

Note: District (already controlled in the analysis), sex, and mother's arm circumference were background factors which were likely to have differed at birth at time of group allocation. The other variables which differed (fever, diarrhoea, child's arm circumference, and height) were measured much later at enrolment and could be a result of group allocation and have therefore not been adjusted for in the analysis.

**Supplementary Table 2. Background factors for the No campaign-OPV-before-enrolment and Campaign-OPV-before enrolment groups (Table 1). Values are percentages (numbers) unless stated otherwise**

|                                                      | No campaign-OPV-<br>before-enrolment<br>(n=5037) | Campaign-OPV-<br>before enrolment<br>(n=1380) | Test    |
|------------------------------------------------------|--------------------------------------------------|-----------------------------------------------|---------|
| <b>Demographic factors</b>                           |                                                  |                                               |         |
| Median (interquartile range) age at enrolment (days) | 151 (142-157)                                    | 152 (142-158)                                 | P=0.001 |
| Bandim district                                      | 42 (2124)                                        | 41 (568)                                      | P=0.50  |
| Male sex                                             | 50 (2539)                                        | 50 (696)                                      | P=0.99  |
| Twins                                                | 3 (171)                                          | 4 (51)                                        | P=0.59  |
| Mother died (no)                                     | 11                                               | 0                                             | P=0.08  |
| <b>Risk factors at enrolment</b>                     |                                                  |                                               |         |
| Not breast fed at 4.5 months                         | 3 (172)                                          | 4 (49)                                        | P=0.81  |
| Pigs in household                                    | 17 (836)                                         | 18 (246)                                      | P=0.28  |
| No of people/bed                                     | 2.9                                              | 2.9                                           | P=0.30  |
| No of people/sleeping room                           | 4.2                                              | 4.3                                           | P=0.03  |
| Toilet inside house                                  | 15 (768)                                         | 16 (202)                                      | P=0.58  |
| Functioning electricity                              | 26 (1293)                                        | 26 (355)                                      | P=0.97  |
| <b>Morbidity and anthropometry at enrolment</b>      |                                                  |                                               |         |
| Fever                                                | 10 (514)                                         | 5 (67)                                        | P<0.001 |
| Diarrhoea                                            | 5 (242)                                          | 3 (47)                                        | P=0.03  |
| Mean respiratory frequency                           | 43                                               | 41                                            | P<0.001 |
| BCG scar                                             | 85 (4301)                                        | 87 (1204)                                     | P=0.08  |
| Have chloroquine at home                             | 33 (1675)                                        | 35 (478)                                      | P=0.34  |
| Mean (SD) weight (g)                                 | 7140 (988)                                       | 7141 (1020)                                   | P=0.72  |
| Mean (SD) arm circumference (mm)                     | 142 (12)                                         | 142 (12)                                      | P=0.32  |
| Mean (SD) height (cm)                                | 64.1 (2.8)                                       | 64.1 (1.8)                                    | P=0.22  |
| Mean (SD) mother's arm circumference                 | 275 (34)                                         | 272 (35)                                      | P<0.01  |

|      |  |  |  |
|------|--|--|--|
| (mm) |  |  |  |
|------|--|--|--|

Note: Age (already controlled in the analysis), number of people per sleeping room, and mother's arm circumference were background factors which were likely to have differed at time of group allocation due to an OPV campaign. The other variables which differed (fever, diarrhoea, and respiratory frequency) were measured much later at enrolment and could be a result of group allocation and have therefore not been adjusted for in the analysis.

**Supplementary table 3. The mortality rates and mortality rate ratio (MRR) of recipients of two-dose MV compared with one dose MV in relation to the timing of OPV at birth (OPV0), adjusted for background factors\*. Per-protocol data set**

| Timing of administration of OPV0              | MRR (two-dose/one-dose MV) (95% CI) | P for trend with age# |
|-----------------------------------------------|-------------------------------------|-----------------------|
| All children (main result of trial)<br>N=6417 | 0.70 (0.52-0.94)                    |                       |
| BCG, No OPV0                                  | 1.03 (0.52-2.01)                    |                       |
| BCG+OPV0 provided<br>Days 0-7                 | 0.47 (0.30-0.74)                    | P=0.03                |
| BCG+OPV0 provided<br>Days 8-14                | 0.79 (0.36-1.72)                    |                       |
| BCG+OPV0 provided<br>Days 15-30               | 1.20 (0.51-2.87)                    |                       |
| BCG+OPV0 provided<br>Days 31+                 | 3.43 (0.82-14.4)                    |                       |

Notes: The estimates are based on a Cox proportional hazards model; \* As seen in Supplementary Table 1, the OPV0 and No OPV0 group differed with respect to sex and mother's muac; # The age-trend tested for a significant linear increase in the effect across the 4 groups.

**Supplementary Table 4. The mortality rates and mortality rate ratio (MRR) of recipients of two-dose MV compared with one dose MV in relation to the administration of campaign-OPV-before-enrolment, adjusted for background factors\*. Per-protocol data set**

|                                  | MRR (two-dose/one-dose MV)<br>(95% CI) |
|----------------------------------|----------------------------------------|
| No campaign-OPV-before-enrolment | 0.61 (0.43-0.87)#                      |
| Campaign-OPV-before-enrolment    | 1.19 (0.64-2.22)#                      |

Notes: The estimates are based on a Cox proportional hazards model; \* As seen in Supplementary Table 2, the No campaign-OPV-before-enrolment and Campaign-OPV-before enrolment differed with respect to number of persons sleeping per room and mother's muac; # Test for whether the effect of early two-dose MV is equal in those receiving no campaign OPV before enrolment and those receiving campaign OPV before enrolment,  $p=0.07$

**Supplementary table 5. The mortality rates and mortality rate ratio (MRR) of recipients of two-dose MV compared with one dose MV in relation to the timing of OPV at birth (OPV0). Intention-to-treat data set**

| Timing of administration of OPV0              | MRR (two-dose/one-dose MV) (95% CI) | P for trend with age# |
|-----------------------------------------------|-------------------------------------|-----------------------|
| All children (main result of trial)<br>N=6417 | 0.78 (0.59-1.05)                    |                       |
| BCG, No OPV0                                  | 1.07 (0.56-2.06)                    |                       |
| BCG+OPV0 provided<br>Days 0-7                 | 0.49 (0.32-0.77)                    | P=0.01                |
| BCG+OPV0 provided<br>Days 8-14                | 0.88 (0.43-1.81)                    |                       |
| BCG+OPV0 provided<br>Days 15-30               | 1.46 (0.68-3.15)                    |                       |
| BCG+OPV0 provided<br>Days 31+                 | 3.64 (0.87-15.3)                    |                       |

Notes: The estimates are based on a Cox proportional hazards model; # The age-trend tested for a significant linear increase in the effect across the 4 groups.

**Supplementary Table 6. The mortality rates and mortality rate ratio (MRR) of recipients of two-dose MV compared with one dose MV in relation to the administration of campaign-OPV-before-enrolment. Intention-to-treat data set**

|                                  | MRR (two-dose/one-dose MV)<br>(95% CI) |
|----------------------------------|----------------------------------------|
| No campaign-OPV-before-enrolment | 0.70 (0.45-1.07)#                      |
| Campaign-OPV-before-enrolment    | 1.16 (0.63-1.51)#                      |

Notes: The estimates are based on a Cox proportional hazards model; # Test for whether the effect of early two-dose MV is equal in those receiving no campaign OPV before enrolment and those receiving campaign OPV before enrolment, p=0.19
